# Supplementary material
Source: Springer Nature journal article supplement (https://www.springermedizin.de/resource/supplementary/13048_2012_129_MOESM1_ESM.pdf/9664968)

dosegram

R<sub>1</sub>

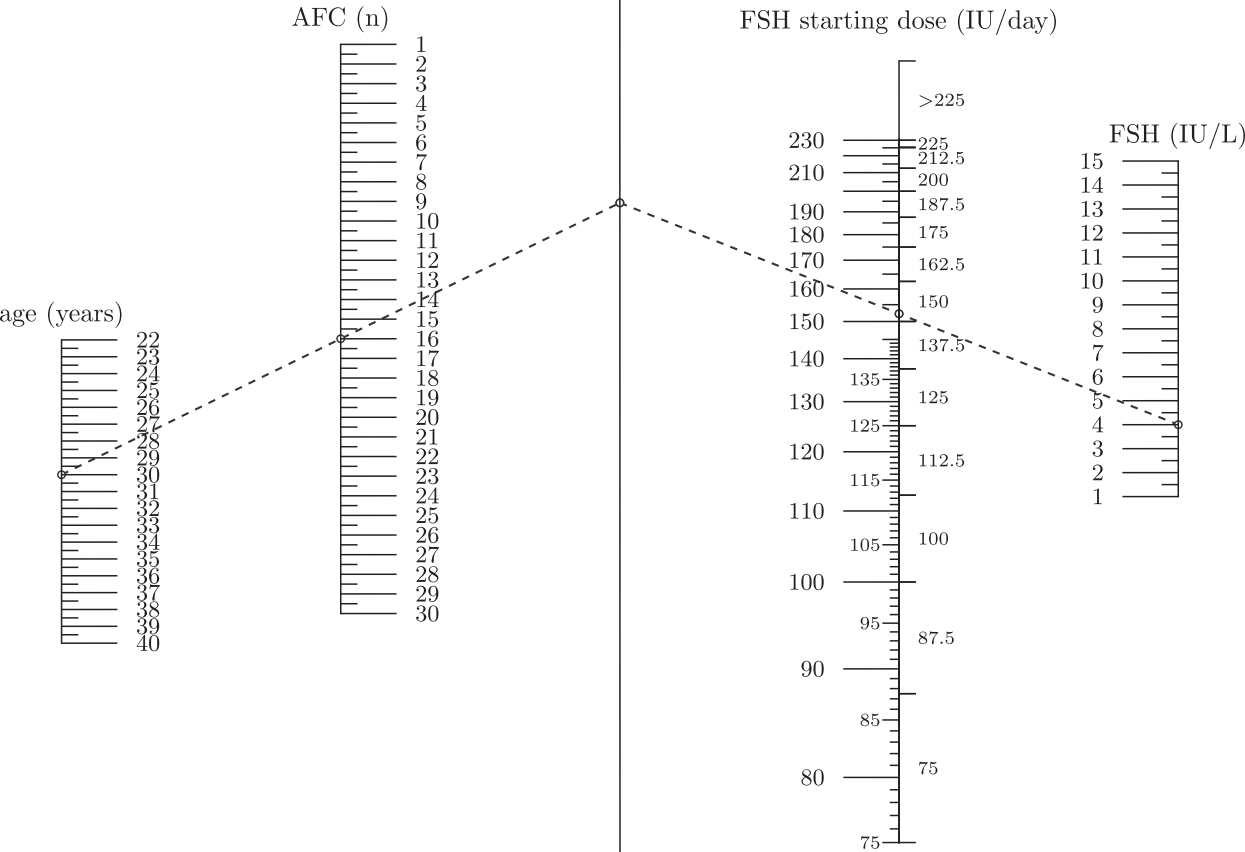

Supplement: MOESM1 [file 9664968]
